# Supplementary material
Source: publisher figshare collection journal article supplement (https://tandf.figshare.com/ndownloader/files/15190373)
Supplement: Supplementary file 1 [file 15190373]

**GC/MS and DFT studies of S,S-dialkyl methylphosphonothioloselenoates related to Schedule 2.B.04 of Chemical Weapons Convention**

**Hamid Saeidiana, Ali Soleimani Karimabada, Mahmood Payeghadra, Mehran Babrib**

*a* Department of Science, Payame Noor University (PNU), P.O Box: 19395-4697, Tehran, Iran

b Defense Chemical Research Lab (DCRL), P.O. Box: 31585-1461, Karaj, Iran

*Email:* [*saeidian1980@gmail.com*](mailto:saeidian1980@gmail.com)

**Experimental**

***Reagents and Chemicals***

All chemicals required for the microsynthesis of **2**, **3** and **4** were purchased from Sigma–Aldrich (St. Louis, MO, USA), Fluka (Neu-Ulm, Germany), and Merck (Darmstadt, Germany), and were used as received. Methylphosphonoselenoyl dichloride **1** was synthesized by a reported method described [1].

***GC/EI-MS analyses***

The GC/EI-MS analyses were performed using an Agilent 6890N gas chromatograph equipped with a 5973 Mass selective detector, by a HP-5MS capillary column of (30 m, 320 μm i.d. and 0.25 μm film thickness), and helium as carrier gas at a constant flow of 1.8 mL min-1. The oven temperature was set at 40 °C for 3 min and then was increased to 280 °C with rate of 10 °C min-1 and held at 280 °C for 6 min. The 0.50 μ L samples in CH2Cl2 were injected in splitless mode at an injection temperature of 250 °C. The temperatures of the EI source and analyzer were kept at 230 and 150 °C, respectively. The scan range was *m/z* 35-500 (Supplementary data). Automated Mass Spectral Deconvolution and Identification software (AMDIS) was used to calculate retention indices of the synthesized compounds. An alkane mixture [octane (C8) to tetracosane (C24)] was used for retention indices calculations.

***Computation details***

Geometry optimizations and frequency calculations for all species were performed using Gaussian 03 program [2]. DFT calculations with the Becke three-parameter hybrid functional (DFT-B3LYP) were performed, using 6–311++g(d, p) basis set. Vibrational frequencies were calculated at the same level to ensure that each stationary point is a true minimum. The harmonic-oscillator approximation was also employed to prepare the thermodynamic partition functions. After geometry optimization and frequency calculations, zero-point energies (ZPEs) and thermal corrections were obtained at 298 K.

***Microsynthesis of S-alkyl methylphosphonochloridoselenoates 2***

The corresponding S-alkyl methylphosphonochloridoselenoates**2** were synthesized by the controlled addition of RSH to methylphosphonoselenoyl dichloride **1**. The appropriate thiol (0.50 mmol) and triethylamine (0.6 mmol) in dichloromethane (500 µL) was added slowly into methylphosphonoselenoyl dichloride (0.45 mmol) in dichloromethane (300 µL), while stirring at 0-5 °C. After 30 min the resulting precipitate was filtered off and the solution was analyzed using GC-MS as required.

***Microsynthesis of S,S-dialkyl methylphosphothioloselenoates 3 and S-alkyl S-alkyl' methylphosphothioloselenoates 4***

The addition of RSH (or R'SH) to the solution of S-alkyl methylphosphonochloridoselenoates**2** afforded the desired products of **3** or **4** (Scheme 1). A mixture of RSH or R'SH (0.50 mmol) and triethylamine (0.6 mmol) in dichloromethane (500 µL) was slowly added into the solution of **2** and the solution was allowed to stir at room temperature for 1 hour. Any precipitate was filtered and the resulting solutions of **3** or **4** were analyzed using GC-MS as required.

**References**

1. Srinivasulu K, Kumar MA, Raju CN, et al. Synthesis and bioactivity of some new 2-substituted-3,4-dihydro-1-(9H-carbazol-4-yloxy)methyl-3-[2-(2-methoxyphenoxy)ethyl]-1,3,2λ5-oxazaphosphole 2-oxides, sulfides and selenides. Arkivoc 2007;xiv:100-109.
2. Frisch MJ, Trucks GW, Schlegel HB, et al. Gaussian, Inc., Wallingford CT, Gaussian 03, Revision E.01, Gaussian, Inc., Pittsburgh PA, 2003.

**EI-MS spectra of compounds 2, 3 and 4**


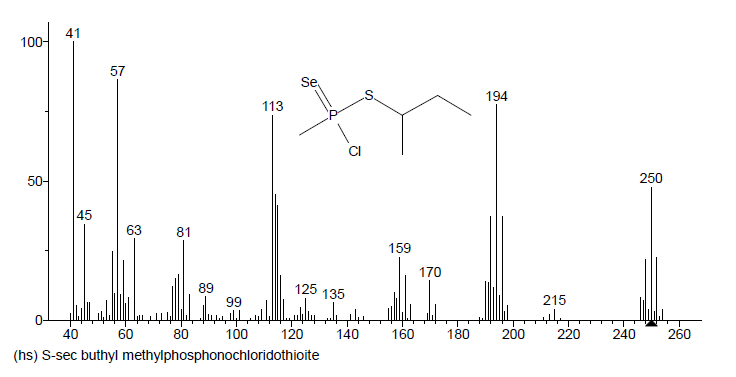


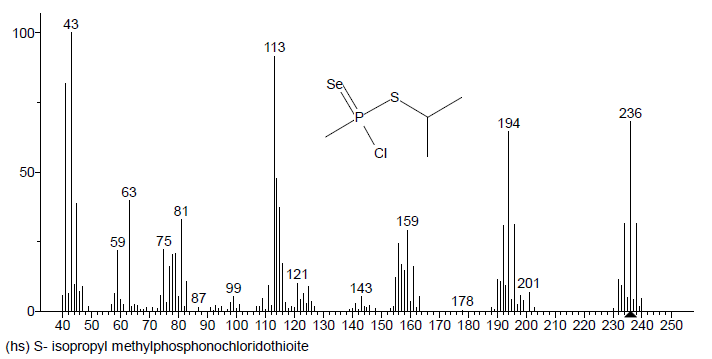


**Optimized geometries of 3, 4 and MS fragments**


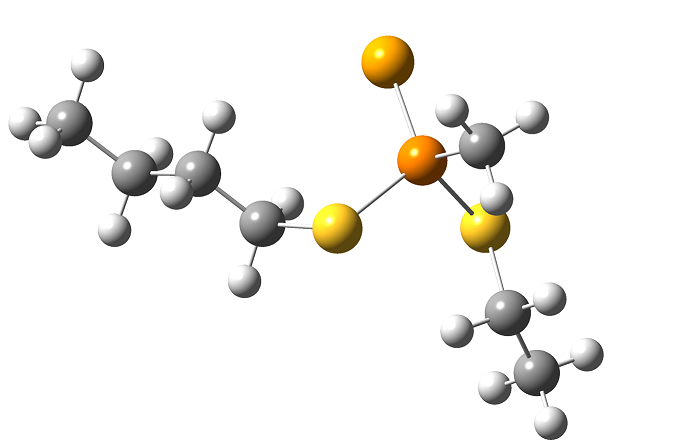


%chk=E:\seeidian\s\calculations\EtBu.chk

# opt b3lyp/6-311++g(d,p)

opt

0 1

P -0.03419762 -0.98283989 0.31723608

S 1.95910237 -0.46355872 0.29073708

S -0.22018772 -3.00926967 -0.00306071

C 2.81985554 -1.34841752 1.57312894

H 2.39852623 -1.09748770 2.52413674

C 4.30999243 -0.96021704 1.55331901

H 4.82741147 -1.49212654 2.32419501

H 4.40659894 0.09234600 1.71968676

C -1.94255373 -3.45796893 0.01983649

H -2.03916024 -4.51053197 -0.14653126

C -2.54895292 -3.09681760 1.38857669

H -2.45234642 -2.04425456 1.55494444

H -2.03153388 -3.62872711 2.15945269

Se -0.97889840 -0.01168250 -1.09022500

C -0.75085121 -0.55602468 1.93483814

H -1.78620606 -0.82574840 1.94860219

H -0.23343217 -1.08793419 2.70571415

H -0.65424471 0.49653836 2.10120589

H 4.73132174 -1.21114686 0.60231121

H -2.45997277 -2.92605943 -0.75103952

C -4.03908981 -3.48501809 1.40838662

H -4.13569631 -4.53758113 1.24201887

H -4.55650885 -2.95310858 0.63751062

H 2.72324904 -2.40098056 1.40676119

C -4.64548900 -3.12386676 2.77712682

H -5.68084385 -3.39359047 2.79089087

H -4.12806996 -3.65577626 3.54800283

H -4.54888250 -2.07130372 2.94349458


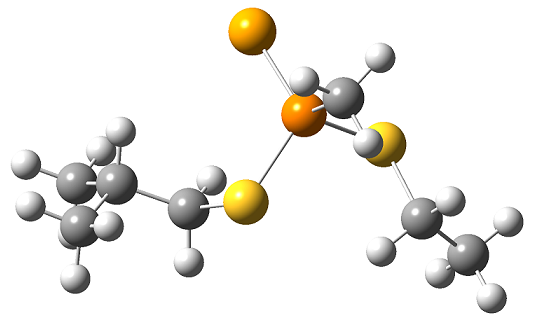


%chk=E:\seeidian\s\calculations\EtiBu.chk

# opt b3lyp/6-311++g(d,p)

opt

0 1

P -0.25443496 -0.79253991 0.73548186

S 1.59545312 -0.12809996 0.11901318

S -0.68648924 -2.57997150 -0.19296707

C 2.83237956 -1.33393593 0.54839951

H 2.83947756 -1.47549090 1.60897097

C 4.21530560 -0.83721869 0.08754429

H 4.95885127 -1.56207514 0.34565854

H 4.43972215 0.09120451 0.56979689

C -2.28493623 -3.15409922 0.33970975

C -2.27472040 -3.35783254 1.86613969

H -2.05030386 -2.42940933 2.34839229

Se -1.61199647 0.53089894 0.26421830

C -0.24236172 -1.03331565 2.53944452

H -1.20322592 -1.37843737 2.85964912

H 0.50118395 -1.75817210 2.79755877

H -0.01794517 -0.10489244 3.02169712

H 4.20820760 -0.69566372 -0.97302716

H -3.02848189 -2.42924277 0.08159549

C -3.65764645 -3.85454978 2.32699491

H -3.88206299 -4.78297298 1.84474231

H -4.40119211 -3.12969333 2.06888066

H 2.60796301 -2.26235914 0.06614691

H -3.65054844 -3.99610475 3.38756637

H -2.50935277 -4.08252243 -0.14254285

C -1.20457057 -4.40108388 2.23763123

H -1.42898711 -5.32950708 1.75537863

H -0.24370637 -4.05596216 1.91742663

H -1.19747256 -4.54263885 3.29820269


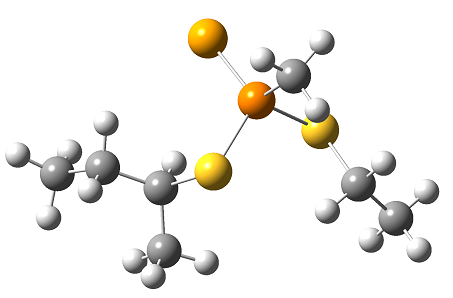


%chk=EtsecBu

# opt b3lyp/6-311++g(d,p)

opt

0 1

P -0.24873868 -0.75088009 0.77384373

S 1.66185826 -0.09078762 0.16886666

S -0.72717633 -2.54035635 -0.23658792

C 2.87172751 -1.33582070 0.56194303

H 2.87274759 -1.51151877 1.61741882

C 4.26619163 -0.85404705 0.12039578

H 4.99347258 -1.60246581 0.35668326

H 4.50881167 0.05341248 0.63279477

C -2.33895953 -3.09721161 0.27377188

C -2.33749138 -3.35008547 1.79286788

H -2.09487133 -2.44262595 2.30526687

H -1.61021042 -4.09850423 2.02915536

Se -1.79166182 0.83688682 0.27256095

C -0.24695592 -1.05794121 2.61846030

H -1.21583683 -1.39268004 2.92524963

H 0.48032503 -1.80635997 2.85474778

H -0.00433588 -0.15048168 3.13085930

H 4.26517155 -0.67834897 -0.93508001

H -3.06624048 -2.34879284 0.03748440

C -3.73195549 -3.83185912 2.23441513

H -3.91674939 -4.86629889 2.43612180

H -4.56091022 -3.16029371 2.15235438

H 2.62910747 -2.24328022 0.04954404

H -3.87067493 -4.14853610 1.22180829

C -2.68815099 -4.40327485 -0.46369956

H -1.96087004 -5.15169361 -0.22741209

H -3.65703190 -4.73801368 -0.15691024

H -2.68917107 -4.22757677 -1.51917535


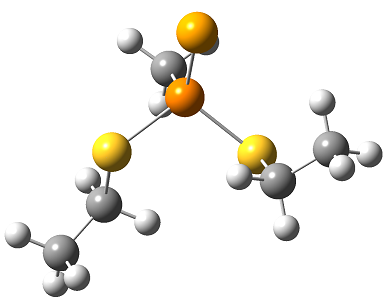


%chk=Etetoptvol.chk

# opt b3lyp/6-311++g(d,p) volume

vol

0 1

P 0.03587900 -0.42066900 0.54435200

S -1.56582500 -0.47587300 -0.74990300

S 0.30482300 1.50590500 1.22227800

C -3.03381200 0.06463500 0.09937100

H -3.22399500 -0.58247500 0.93002100

C -4.23120300 0.02336500 -0.86817900

H -5.11364400 0.34827700 -0.35766100

H -4.37089700 -0.97733100 -1.22030600

C 0.62120200 2.58240500 -0.15955100

H 0.76089600 3.58310100 0.19257500

C 1.89125800 2.11477400 -0.89431600

H 1.75156400 1.11407800 -1.24644200

H 2.72321100 2.14344800 -0.22205700

Se 1.86674000 -1.09478600 -0.51485400

C -0.28760900 -1.52136000 1.95723400

H 0.54434400 -1.49268600 2.62949300

H -1.17005100 -1.19644800 2.46775200

H -0.42730300 -2.52205600 1.60510700

H -4.04102000 0.67047500 -1.69882900

H -0.21075100 2.55373100 -0.83181000

H -2.89411800 1.06533100 0.45149700

H 2.08144100 2.76188400 -1.72496600


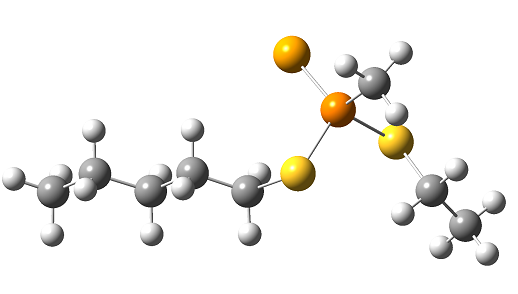


%chk=Etpen-pen vol.chk

# opt b3lyp/6-311++g(d,p) volume

vol

0 1

P 0.47899303 0.12724978 1.30642427

S 1.47671140 -0.08286769 -0.48355022

S -0.40201969 -1.66381114 1.81585274

C 2.73060684 -1.33567798 -0.32041651

H 3.42373402 -1.04932477 0.44278500

C 3.47647397 -1.49275609 -1.65855278

H 4.23022011 -2.24584992 -1.56048926

H 3.93408737 -0.56244775 -1.92315883

C -1.55507239 -2.14017442 0.54622779

H -2.01268579 -3.07048276 0.81083384

C -2.63990328 -1.05628238 0.40508964

H -2.18228987 -0.12597403 0.14048359

H -3.15813563 -0.94714369 1.33483367

Se -1.08485410 1.68974351 1.10296537

C 1.65795702 0.61431786 2.60458012

H 1.13972467 0.72345655 3.53432415

H 2.41170316 -0.13877596 2.70264364

H 2.11557043 1.54462620 2.33997407

H 2.78334679 -1.77910930 -2.42175430

H -1.03684003 -2.24931311 -0.38351624

C -3.63748819 -1.46841690 -0.69334992

H -4.09510160 -2.39872524 -0.42874387

H -3.11925584 -1.57755559 -1.62309396

H 2.27299344 -2.26598632 -0.05581046

C -4.72231908 -0.38452486 -0.83448808

H -5.24055144 -0.27538617 0.09525596

H -4.26470568 0.54578349 -1.09909412

C -5.71990400 -0.79665938 -1.93292764

H -6.17751740 -1.72696773 -1.66832159

H -6.47365014 -0.04356556 -2.03099116

H -5.20167164 -0.90579807 -2.86267167


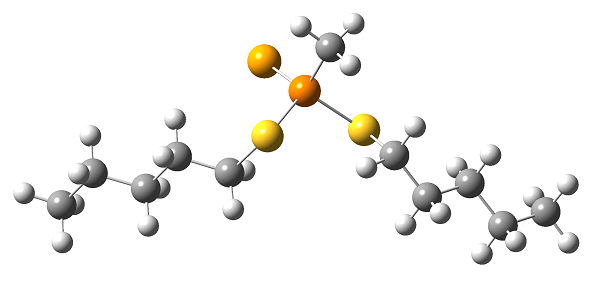


%chk=penpen.chk

# opt freq b3lyp/6-311++g(d,p)

penpen

0 1

P -1.26951200 -0.58207000 0.42734900

S -2.57291300 0.29442200 -1.02839600

S -0.17853400 0.98774700 1.40630600

C -3.44086600 1.64829300 -0.10540800

H -4.15076700 1.19997800 0.59155400

C -4.16196600 2.55243200 -1.10331700

H -4.68924000 3.34472500 -0.56415100

C 1.20017500 1.28770700 0.20488400

H 1.26261600 2.37334500 0.10649200

C 2.52503800 0.68726400 0.66891800

H 2.40699100 -0.39574700 0.76574700

H 2.77154000 1.07204000 1.66502600

Se -0.15265300 -2.12614000 -0.49392000

C -2.33734700 -1.10785700 1.82063500

H -1.70664300 -1.57328100 2.57864000

H -2.87024500 -0.25876500 2.25299500

H -3.04899400 -1.84029100 1.43882700

H -3.45775000 3.02113400 -1.79400900

H 0.89665600 0.87679300 -0.76020800

H -2.69101900 2.20567300 0.45830200

C 3.66840600 1.00360800 -0.30402800

H 3.77072100 2.09164400 -0.41105200

H 3.41408400 0.61946400 -1.29972600

C 5.01298100 0.41241500 0.13624200

H 4.90895200 -0.67346700 0.24439900

H 5.26669500 0.79542600 1.13211800

C 6.15428900 0.72248400 -0.83642900

H 6.30460400 1.80184100 -0.94021800

H 7.09773500 0.28760900 -0.49512700

H 5.94480100 0.32062900 -1.83266900

C -5.20074477 1.77136161 -1.92943304

H -4.72977438 1.36021136 -2.79778917

H -5.60669712 0.97953198 -1.33520369

C -6.33310047 2.72168311 -2.36101108

H -6.85202274 3.07486727 -1.49447740

H -5.91821455 3.55297304 -2.89179042

C -7.31572112 1.96724714 -3.27582420

H -8.10884341 2.62420250 -3.56611146

H -6.79939724 1.62429023 -4.14799977

H -7.72165235 1.12906285 -2.74897799


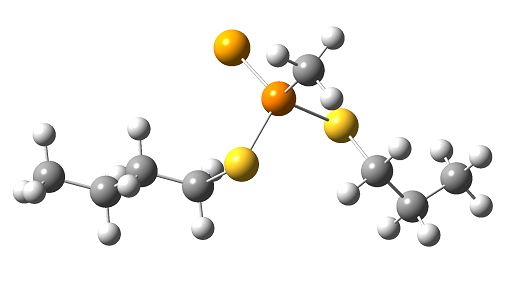


%chk=PrBu.chk

# opt freq b3lyp/6-311++g(d,p)

prBu

0 1

P -1.26951200 -0.58207000 0.42734900

S -2.57291300 0.29442200 -1.02839600

S -0.17853400 0.98774700 1.40630600

C -3.44086600 1.64829300 -0.10540800

H -4.15076700 1.19997800 0.59155400

C -4.16196600 2.55243200 -1.10331700

H -4.68924000 3.34472500 -0.56415100

C 1.20017500 1.28770700 0.20488400

H 1.26261600 2.37334500 0.10649200

C 2.52503800 0.68726400 0.66891800

H 2.40699100 -0.39574700 0.76574700

H 2.77154000 1.07204000 1.66502600

Se -0.15265300 -2.12614000 -0.49392000

C -2.33734700 -1.10785700 1.82063500

H -1.70664300 -1.57328100 2.57864000

H -2.87024500 -0.25876500 2.25299500

H -3.04899400 -1.84029100 1.43882700

H -3.45775000 3.02113400 -1.79400900

H 0.89665600 0.87679300 -0.76020800

H -2.69101900 2.20567300 0.45830200

C 3.66840600 1.00360800 -0.30402800

H 3.77072100 2.09164400 -0.41105200

H 3.41408400 0.61946400 -1.29972600

C 5.01298100 0.41241500 0.13624200

H 4.92869496 -0.65193434 0.20664335

H 5.28309995 0.81274076 1.09105876

C -5.20074477 1.77136161 -1.92943304

H -4.72977470 1.36021132 -2.79778932

H -5.60669701 0.97953205 -1.33520353

H 5.76540413 0.66389900 -0.58175190

H -5.98751148 2.43164970 -2.22929599


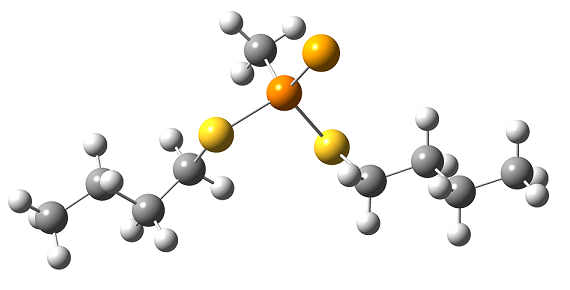


%chk=BuBu.chk

# opt freq b3lyp/6-311++g(d,p)

BuBu

0 1

P -1.26951200 -0.58207000 0.42734900

S -2.57291300 0.29442200 -1.02839600

S -0.17853400 0.98774700 1.40630600

C -3.44086600 1.64829300 -0.10540800

H -4.15076700 1.19997800 0.59155400

C -4.16196600 2.55243200 -1.10331700

H -4.68924000 3.34472500 -0.56415100

C 1.20017500 1.28770700 0.20488400

H 1.26261600 2.37334500 0.10649200

C 2.52503800 0.68726400 0.66891800

H 2.40699100 -0.39574700 0.76574700

H 2.77154000 1.07204000 1.66502600

Se -0.15265300 -2.12614000 -0.49392000

C -2.33734700 -1.10785700 1.82063500

H -1.70664300 -1.57328100 2.57864000

H -2.87024500 -0.25876500 2.25299500

H -3.04899400 -1.84029100 1.43882700

H -3.45775000 3.02113400 -1.79400900

H 0.89665600 0.87679300 -0.76020800

H -2.69101900 2.20567300 0.45830200

C 3.66840600 1.00360800 -0.30402800

H 3.77072100 2.09164400 -0.41105200

H 3.41408400 0.61946400 -1.29972600

C 5.01298100 0.41241500 0.13624200

H 4.92869496 -0.65193434 0.20664335

H 5.28309995 0.81274076 1.09105876

C -5.20074477 1.77136161 -1.92943304

H -4.72977438 1.36021136 -2.79778917

H -5.60669712 0.97953198 -1.33520369

C -6.33310047 2.72168311 -2.36101108

H -6.85202301 3.07486736 -1.49447760

H -5.91821436 3.55297296 -2.89179041

H -7.01583067 2.19749732 -2.99662790

H 5.76540413 0.66389900 -0.58175190


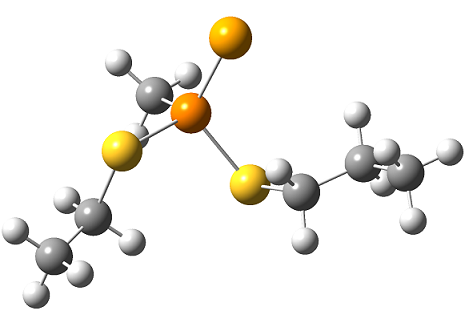


%chk=EtPr.chk

# opt freq b3lyp/6-311++g(d,p)

etPr

0 1

P 0.13596555 -0.03618902 0.94393152

S -1.23815056 -0.34230051 -0.55996365

S 0.41548575 1.98635032 1.21743302

C -2.78556551 0.41544480 -0.11305311

H -3.14720090 -0.02059924 0.79468332

C -3.81281736 0.18660417 -1.23732426

H -4.74300499 0.64210275 -0.96867579

H -3.95800503 -0.86393811 -1.37938572

C 1.01708481 2.71173199 -0.29263320

H 1.16227249 3.76227427 -0.15057174

C 2.35585954 2.05615459 -0.67928614

H 2.21067187 1.00561231 -0.82134760

H 3.06959946 2.21515424 0.10186329

Se 2.06588756 -0.98124216 0.38654871

C -0.47915260 -0.77787140 2.48793181

H 0.23458732 -0.61887174 3.26908124

H -1.40934023 -0.32237282 2.75658028

H -0.62434027 -1.82841368 2.34587035

H -3.45118197 0.62264820 -2.14506070

H 0.30334489 2.55273233 -1.07378263

H -2.64037783 1.46598708 0.02900835

C 2.87634413 2.68373198 -1.98574793

H 3.02153180 3.73427426 -1.84368647

H 3.80653176 2.22823340 -2.25439640

H 2.16260420 2.52473233 -2.76689736


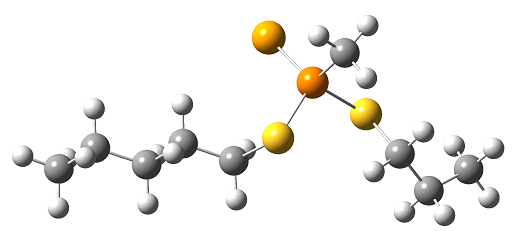


%chk=PrPen.chk

# opt freq b3lyp/6-311++g(d,p)

prpen

0 1

P 0.45002600 0.77342300 0.53344300

S 2.07201100 0.09852500 -0.68940100

S -0.48788700 -0.93103400 1.44435300

C 3.01283200 -1.06065100 0.41588800

H 3.59262400 -0.47033500 1.12928700

C 3.93580000 -1.96077600 -0.41141600

H 4.36988800 -2.69223100 0.28046400

C -1.60240500 -1.51243000 0.08309100

H -1.46482900 -2.59493000 0.04362900

C -3.06376800 -1.13894400 0.31918500

H -3.14685500 -0.04938900 0.36796300

H -3.38861400 -1.52776900 1.29109200

Se -0.77333900 2.07050600 -0.60751000

C 1.21113900 1.51802200 2.02481800

H 0.41311600 1.88473300 2.67110800

H 1.81937900 0.78895400 2.56367200

H 1.83113300 2.35431300 1.70094900

H 3.33487600 -2.53056900 -1.12723300

H -1.23301100 -1.08996200 -0.85365300

H 2.28060500 -1.66102600 0.95871300

C -3.97993200 -1.68271200 -0.78534400

H -3.87806900 -2.77356500 -0.84152200

H -3.64753300 -1.29217700 -1.75407800

C -5.45122600 -1.31823900 -0.56559500

H -5.58849500 -0.23316500 -0.54050200

H -5.82200700 -1.72170600 0.38185400

C 5.06154700 -1.22052000 -1.13940000

H 4.67059300 -0.51520300 -1.87723700

H 5.68182600 -0.65648400 -0.43589000

H 5.71036800 -1.92495200 -1.66588300

C -6.33934325 -1.87767998 -1.69248166

H -6.21785977 -2.93927820 -1.74861526

H -7.36370385 -1.64625210 -1.48747799

H -6.05353433 -1.43621194 -2.62431814


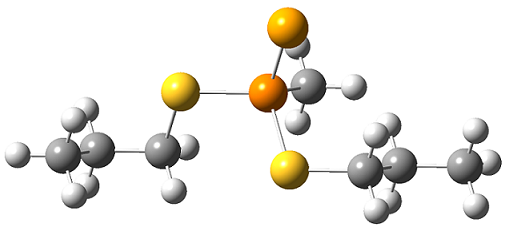


%chk=13.chk

# opt freq=noraman b3lyp/6-311++g(d,p)

13

0 1

P -1.42077537 -1.13494925 -0.29945138

C -0.01749934 -1.38208604 -1.43176750

H 0.44904704 -0.44029168 -1.63241114

H 0.69276209 -2.04302915 -0.98056587

H -0.36930420 -1.80823200 -2.34802781

C 0.59690124 -1.44914142 2.41964119

H 0.13035487 -2.39093577 2.62028483

H 1.42190418 -1.59443612 1.75393885

C 1.10323721 -0.83580986 3.73837099

H 1.81349864 -1.49675297 4.18957261

H 0.27823427 -0.69051515 4.40407332

C 1.77471517 0.51966987 3.44959416

H 1.06445374 1.18061298 2.99839254

H 2.12652003 0.94581583 4.36585447

H 2.59971811 0.37437517 2.78389183

S -2.78819457 0.13752066 -1.16811992

C -2.01207070 1.70424399 -1.50190093

H -1.18706776 1.55894928 -2.16760326

H -2.72233213 2.36518710 -1.95310255

C -1.50573473 2.31757555 -0.18317113

H -2.33073767 2.46287025 0.48253120

H -0.79547330 1.65663244 0.26803049

C -0.83425677 3.67305528 -0.47194796

H -0.48245191 4.09920123 0.44431235

H -0.00925383 3.52776057 -1.13765029

H -1.54451821 4.33399839 -0.92314958

S -2.21120085 -2.73054253 0.04048020

Se -0.69086248 -0.25079596 1.60157469


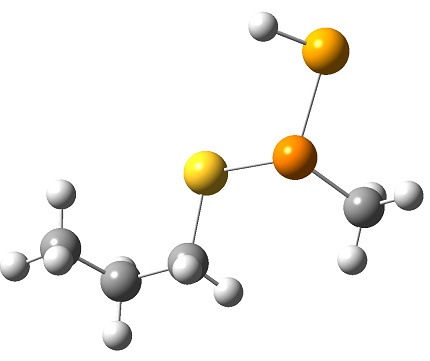


%chk=8.chk

# opt freq=noraman b3lyp/6-311++g(d,p)

8

1 2

P -1.26040964 -0.85442163 0.04637337

C 0.19912336 -0.57430600 -1.00419727

H 0.53255765 0.43592379 -0.88949181

H 0.98174927 -1.24342665 -0.71320887

H -0.05885975 -0.75073179 -2.02753429

S -0.76373188 -0.51476078 2.01653623

C 0.53820656 -1.62787736 2.50061038

H 0.20477226 -2.63810715 2.38590493

H 1.39628365 -1.46319400 1.88296721

C 0.90950935 -1.37395614 3.97345058

H 1.69213527 -2.04307678 4.26443898

H 0.05143226 -1.53863951 4.59109375

C 1.38940544 0.08001945 4.13854067

H 0.60677953 0.74914009 3.84755227

H 1.64738855 0.25644523 5.16187769

H 2.24748254 0.24470281 3.52089749

Se -1.95220790 -2.95041242 -0.19161364

H -0.87701155 -3.86967162 0.20815546


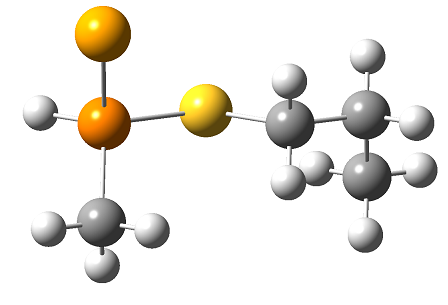


%chk=9.chk

# opt freq=noraman b3lyp/6-311++g(d,p)

9

1 2

P -1.27162746 -0.86356237 0.07879507

C 0.18554027 -0.61320365 -0.98251672

H 0.52990441 0.39501778 -0.88350716

H 0.96266104 -1.28627899 -0.68594817

H -0.07925811 -0.80116082 -2.00205284

S -0.76182871 -0.50170091 2.04164033

C 0.53095163 -1.62139633 2.53499735

H 0.18658749 -2.62961776 2.43598779

H 1.38763816 -1.47420741 1.91103932

C 0.91206333 -1.35087854 4.00236710

H 1.68918409 -2.02395388 4.29893565

H 0.05537680 -1.49806746 4.62632513

C 1.40769022 0.10020650 4.14486684

H 0.63056946 0.77328184 3.84829830

H 1.67248860 0.28816367 5.16440297

H 2.26437675 0.24739542 3.52090881

Se -1.98610260 -2.95538626 -0.12662663

H -2.25210693 -0.01435516 -0.29538020


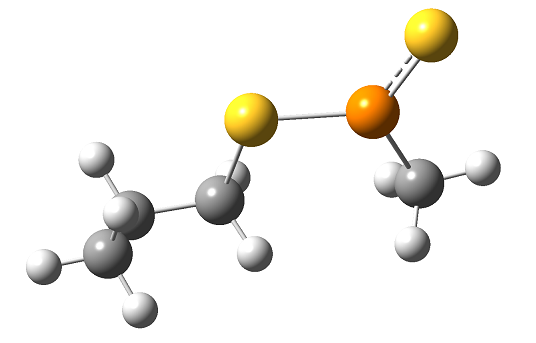


%chk=12.chk

# opt freq=noraman b3lyp/6-311++g(d,p)

12

1 1

P -0.90750162 -1.28327321 0.06765895

C 0.07072508 -0.55614471 -1.28391667

H 0.35996659 0.43943891 -1.01924213

H 0.94552708 -1.14941300 -1.45021218

H -0.51820713 -0.53097239 -2.17690335

S -0.56448987 -0.70398102 2.01454454

C 0.67067540 -1.76111140 2.73928042

H 0.32662722 -2.77417388 2.72394229

H 1.57904428 -1.68440942 2.17902799

C 0.92710166 -1.32804831 4.19471917

H 1.66958865 -1.96351432 4.63037500

H 0.01873278 -1.40475029 4.75497160

C 1.42227380 0.13000424 4.21679461

H 0.67978681 0.76547025 3.78113877

H 1.60044010 0.43089872 5.22804100

H 2.33064268 0.20670622 3.65654217

S -2.18370874 -2.51730229 -0.29937164


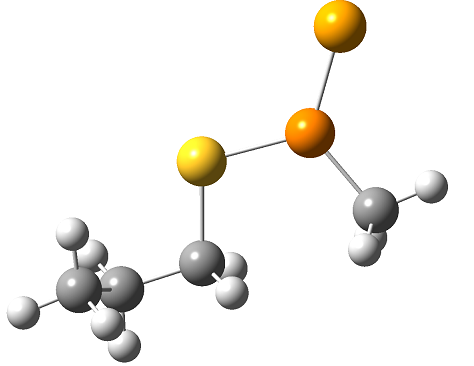


%chk=11.chk

# opt freq=noraman b3lyp/6-311++g(d,p)

11

1 1

P -0.90750162 -1.28327321 0.06765895

C 0.07072508 -0.55614471 -1.28391667

H 0.35996659 0.43943891 -1.01924213

H 0.94552708 -1.14941300 -1.45021218

H -0.51820712 -0.53097239 -2.17690335

S -0.56448987 -0.70398102 2.01454454

C 0.67067540 -1.76111140 2.73928042

H 0.32662722 -2.77417388 2.72394229

H 1.57904428 -1.68440942 2.17902799

C 0.92710166 -1.32804831 4.19471917

H 1.66958865 -1.96351432 4.63037500

H 0.01873278 -1.40475029 4.75497160

C 1.42227381 0.13000424 4.21679461

H 0.67978681 0.76547025 3.78113877

H 1.60044010 0.43089873 5.22804100

H 2.33064268 0.20670622 3.65654217

Se -2.28283162 -2.61314921 -0.32787887


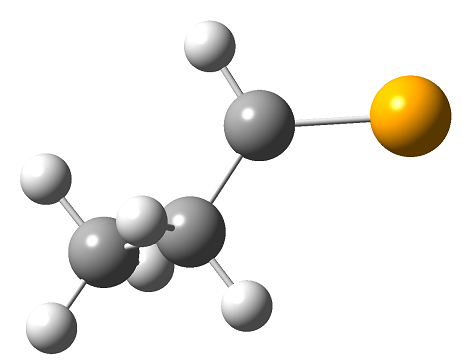


%chk=10.chk

# opt freq=noraman b3lyp/6-311++g(d,p)

10

0 1

C -2.82031064 0.36884091 0.01250634

H -2.31257826 -0.57264780 -0.01408014

H -2.55584091 0.94122876 -0.85197495

H -3.87747387 0.20382963 0.02129220

C -2.41017969 1.13756304 1.28233267

H -2.91791207 2.07905175 1.30891915

H -2.67464943 0.56517518 2.14681396

C -0.88865505 1.37505590 1.26968761

H -0.37094063 1.47786031 0.33893359

Se -0.02795692 1.47430784 2.74070073


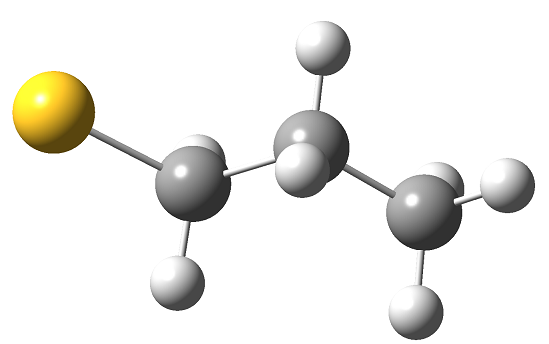


%chk=2.chk

# opt freq=noraman b3lyp/6-311++g(d,p)

2

0 2

C -2.84900312 0.32762132 0.00000792

H -2.49247760 -0.68123424 0.00008487

H -2.49220160 0.83193033 -0.87364252

H -3.91900311 0.32777102 -0.00007082

C -2.33566075 1.05357566 1.25741394

H -2.69218627 2.06243123 1.25733700

H -2.69246228 0.54926665 2.13106438

C -0.79566077 1.05336021 1.25752728

H -0.43885925 1.55766922 0.38387684

H -0.43913525 0.04450464 1.25760423

S -0.20231699 1.89245029 2.71089268
